# Supplementary material for: Characterization of crAss-like phage isolates highlights Crassvirales genetic heterogeneity and worldwide distribution
Source: PubMed Central journal article supplement (PMC10354031; doi:10.1038/s41467-023-40098-z), 2023-07-18
Supplement: 41467_2023_40098_MOESM1_ESM.pdf [file 41467_2023_40098_MOESM1_ESM.pdf]

## **SUPPLEMENTARY INFORMATION**

**Characterization of crAss-like phage isolates highlights Crassvirales genetic heterogeneity and worldwide distribution**

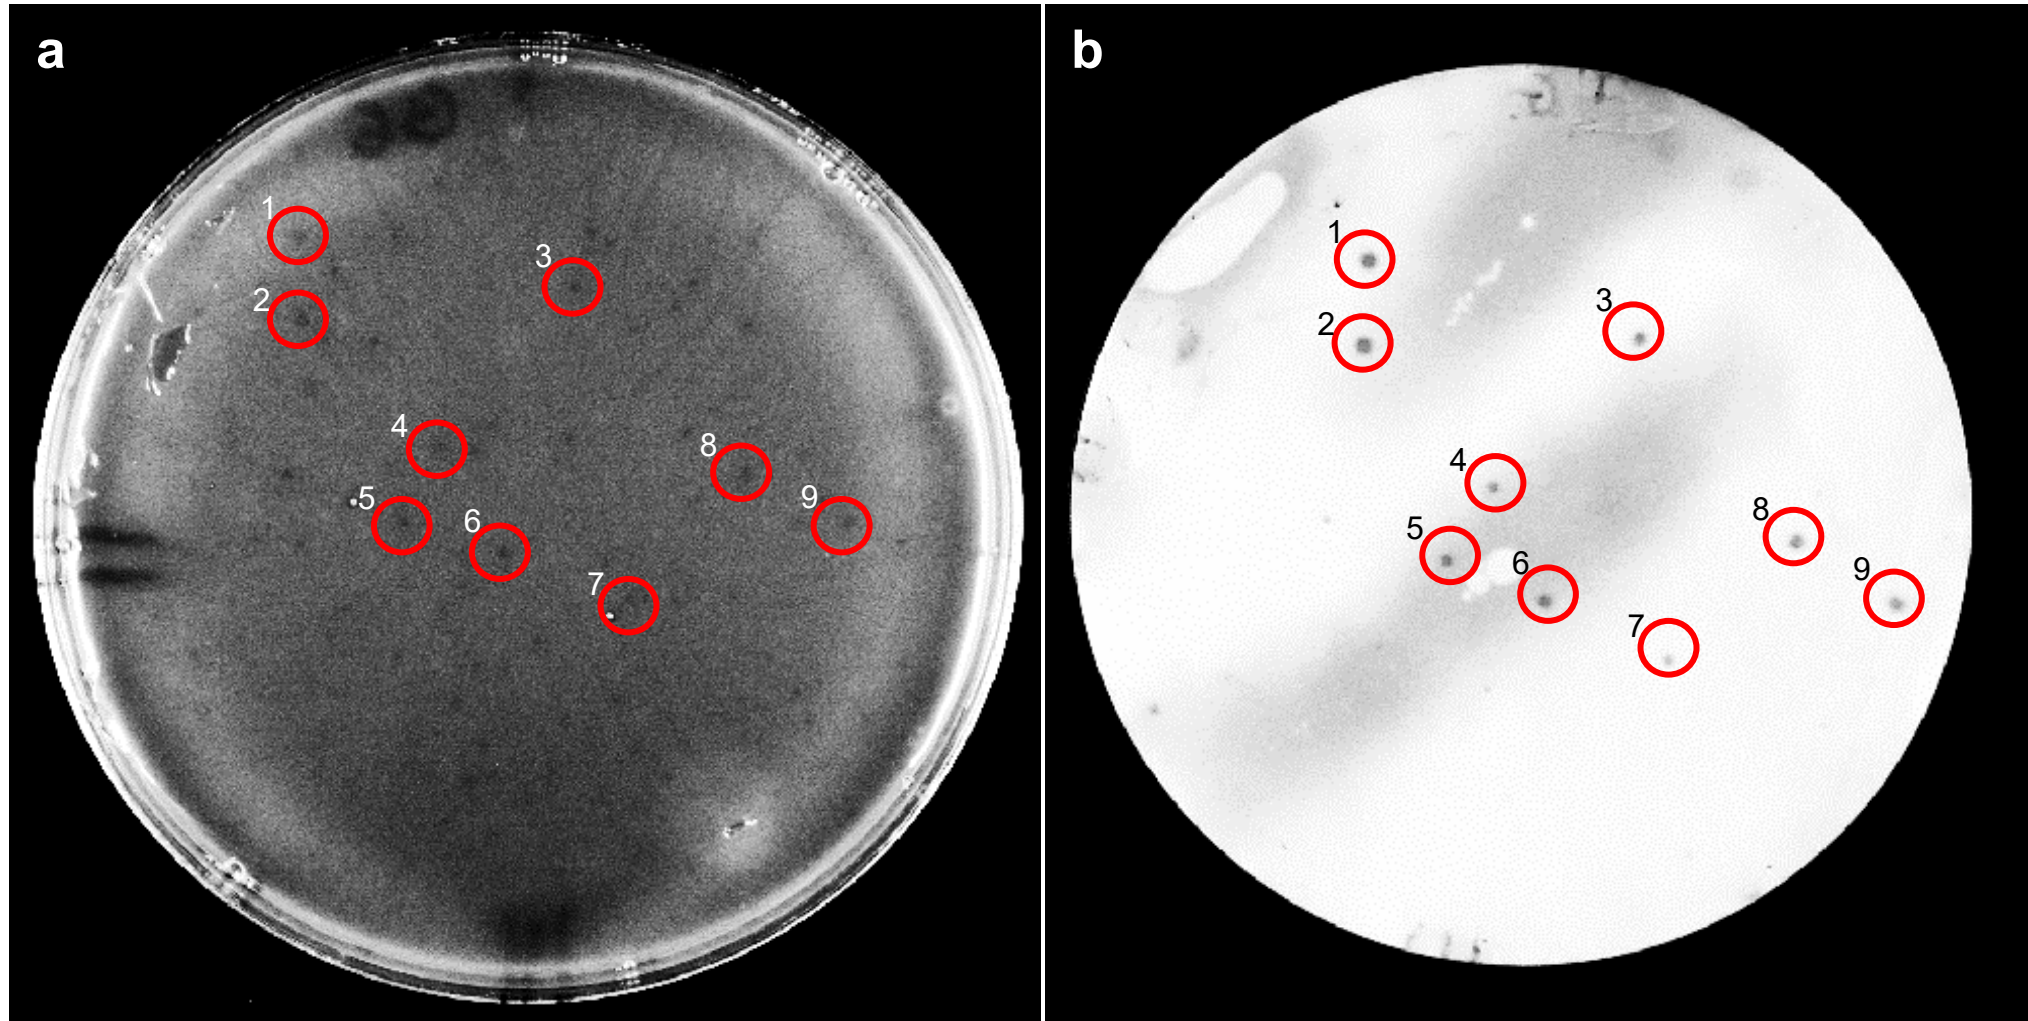

**Supplementary Fig. 1. Detection of crAssphage lysis plaques.** Representative morphology of the plaques produced by the crAssBcn phages in *B. intestinalis* and plaque blot hybridization. (a) Plaque enumeration by the double agar layer method of phage  $\Phi$ CrAssBcn6 infecting *B. intestinalis* from a wastewater sample (WWTP Gava 1). (b) Plaque blot hybridization of phages transferred from (a) using the CrAss1-ORF46 probe.

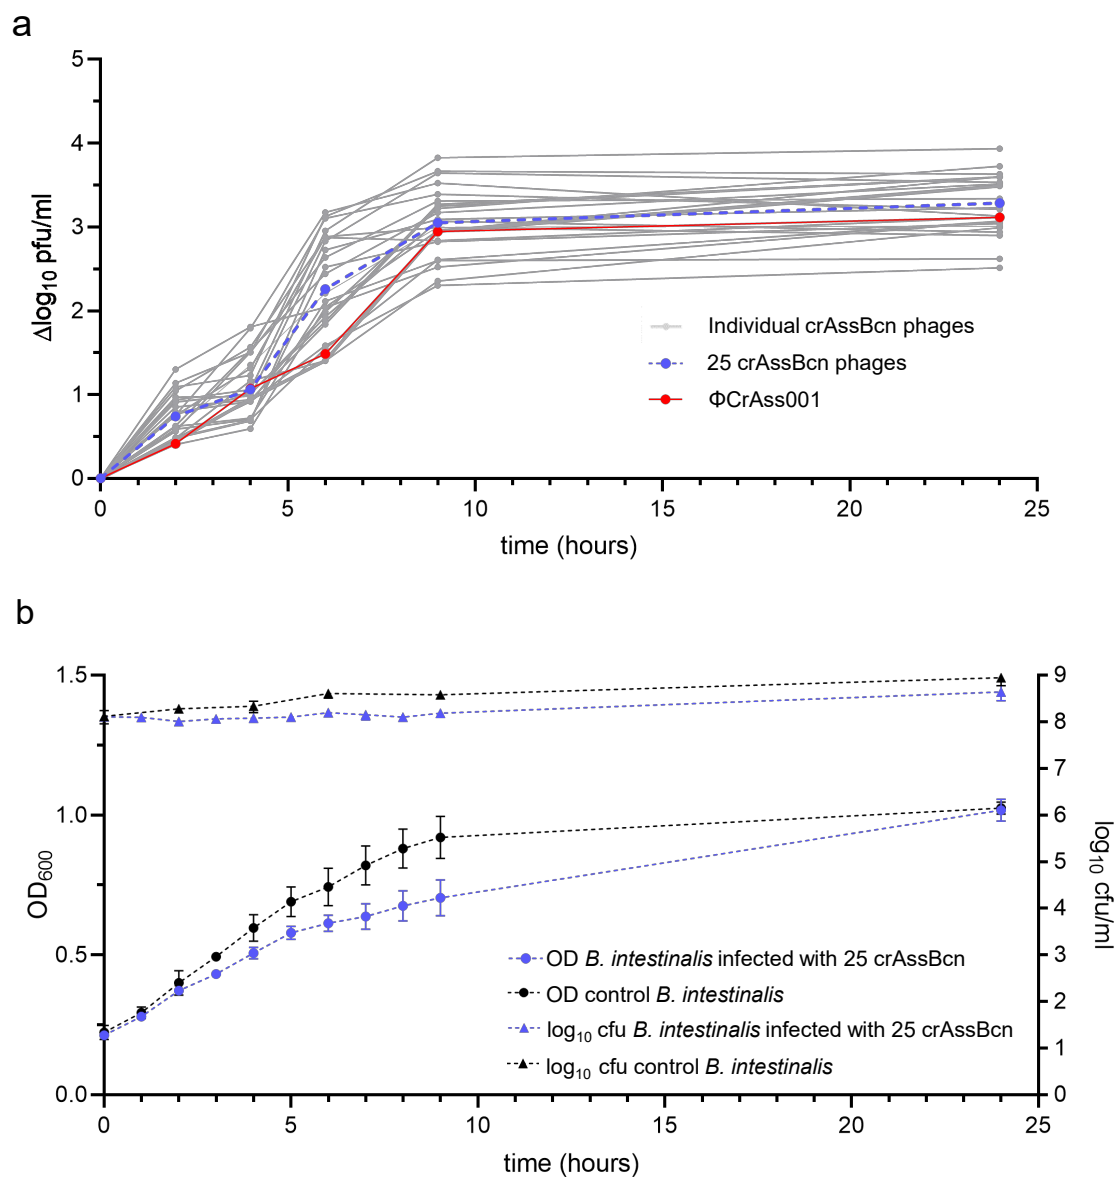

**Supplementary Fig. 2. Infectivity dynamics of crAssBcn phages.** (a) Increase in the number of infectious phage particles measured during 24 h by the double agar layer method and expressed in  $\log_{10}$  pfu/ml. Values in the grey lines (crAssBcn phages) and red ( $\Phi$ CrAss001) are the average of three replicates performed with each individual phage. Blue dotted line corresponds to the median of the 25 crAssBcn phages (b) Growth of the host strain *B. intestinalis* plotted on the left Y-axis was measured by the increase in optical density (OD) at 600 nm and values are presented with circles. Growth of the host strain *B. intestinalis* plotted on the right Y-axis was measured by colony counts (cfu/ml) and values are presented with triangles. Each value corresponds to the median of seven bacterial cultures uninfected (black) or infected with the 25 crAssBcn phages (blue). Source data are provided as a Source Data file.

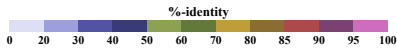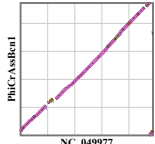

NC\_049977  
Bacteroides phage crAss001  
102,679 nt

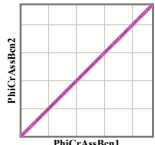

PhiCrAssBen1  
PhiCrAssBen1  
99,312 nt

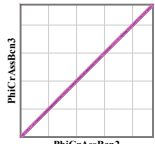

PhiCrAssBen2  
PhiCrAssBen2  
99,311 nt

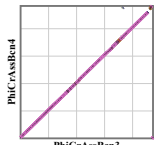

PhiCrAssBen3  
PhiCrAssBen3  
99,312 nt

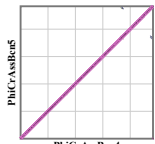

PhiCrAssBen4  
PhiCrAssBen4  
101,446 nt

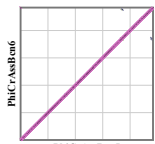

PhiCrAssBen5  
PhiCrAssBen5  
101,573 nt

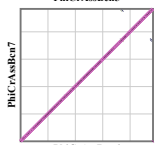

PhiCrAssBen6  
PhiCrAssBen6  
101,578 nt

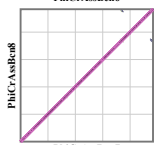

PhiCrAssBen7  
PhiCrAssBen7  
101,577 nt

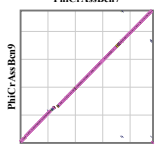

PhiCrAssBen8  
PhiCrAssBen8  
101,575 nt

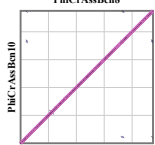

PhiCrAssBen9  
PhiCrAssBen9  
99,752 nt

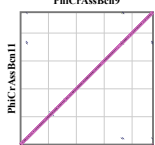

PhiCrAssBen10  
PhiCrAssBen10  
99,753 nt

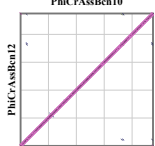

PhiCrAssBen11  
PhiCrAssBen11  
99,752 nt

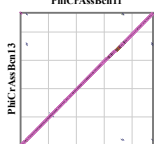

PhiCrAssBen12  
PhiCrAssBen12  
99,750 nt

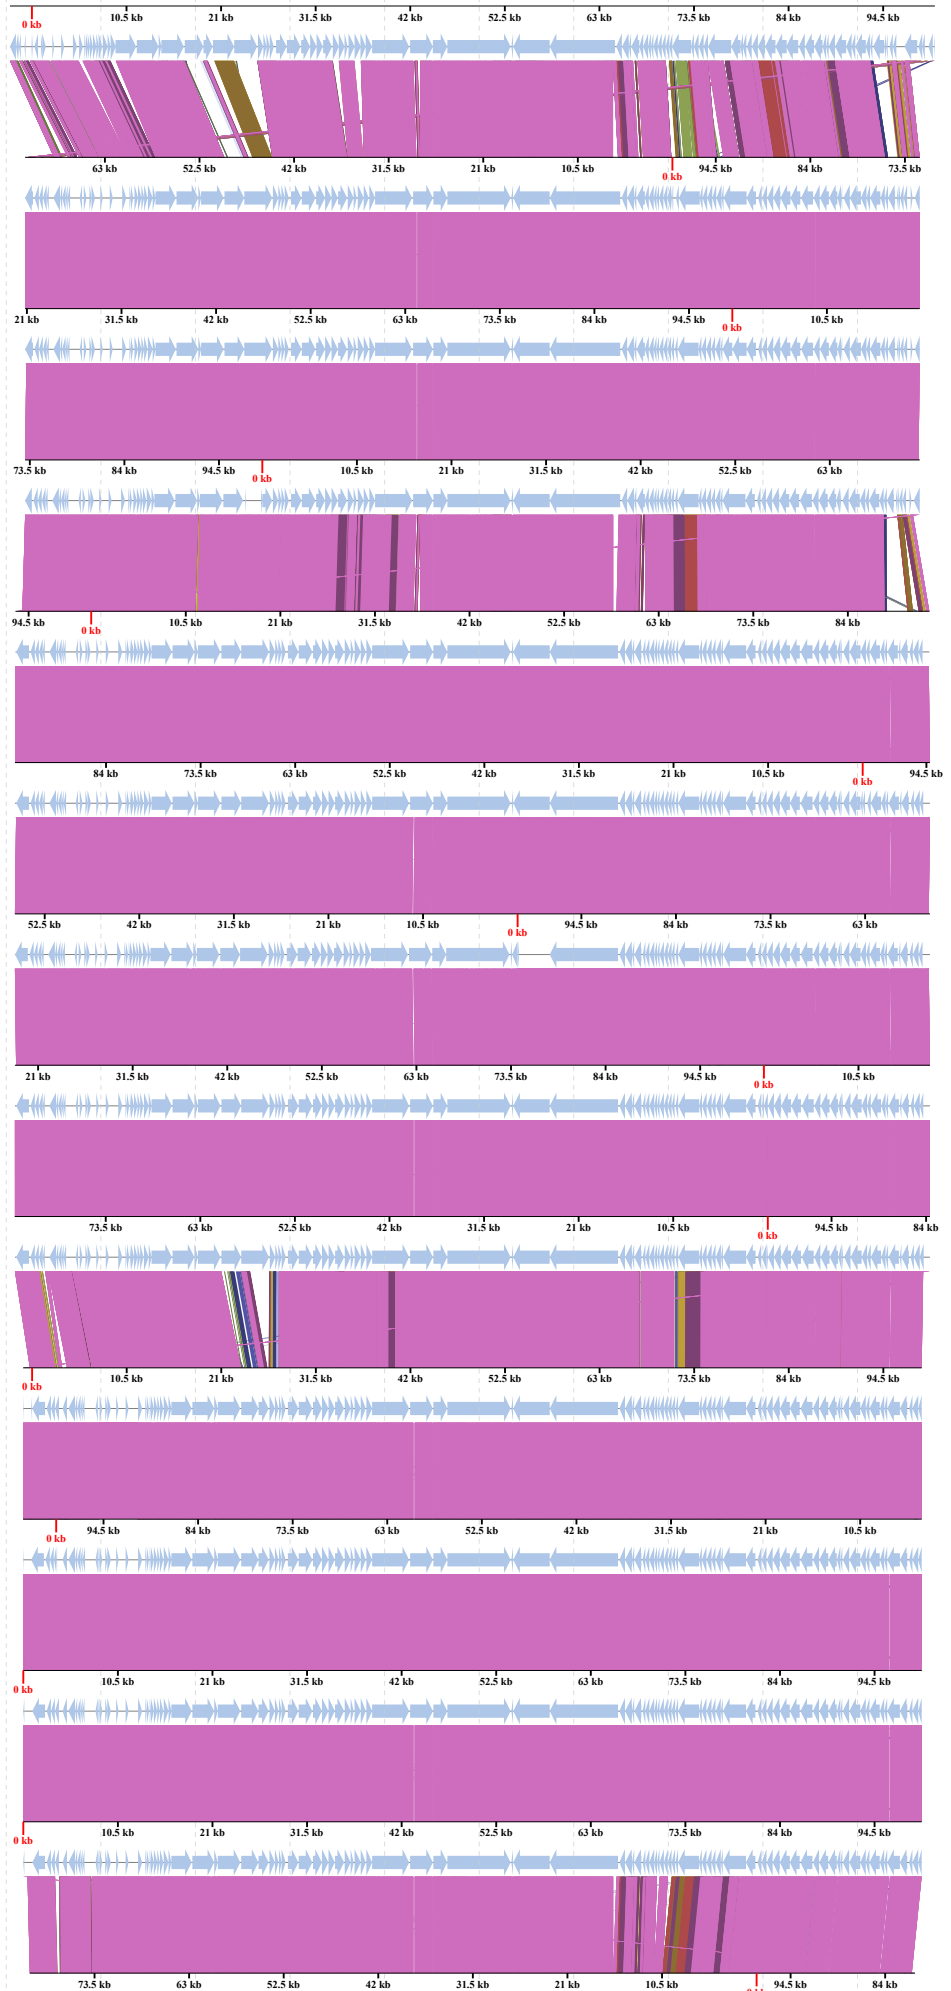

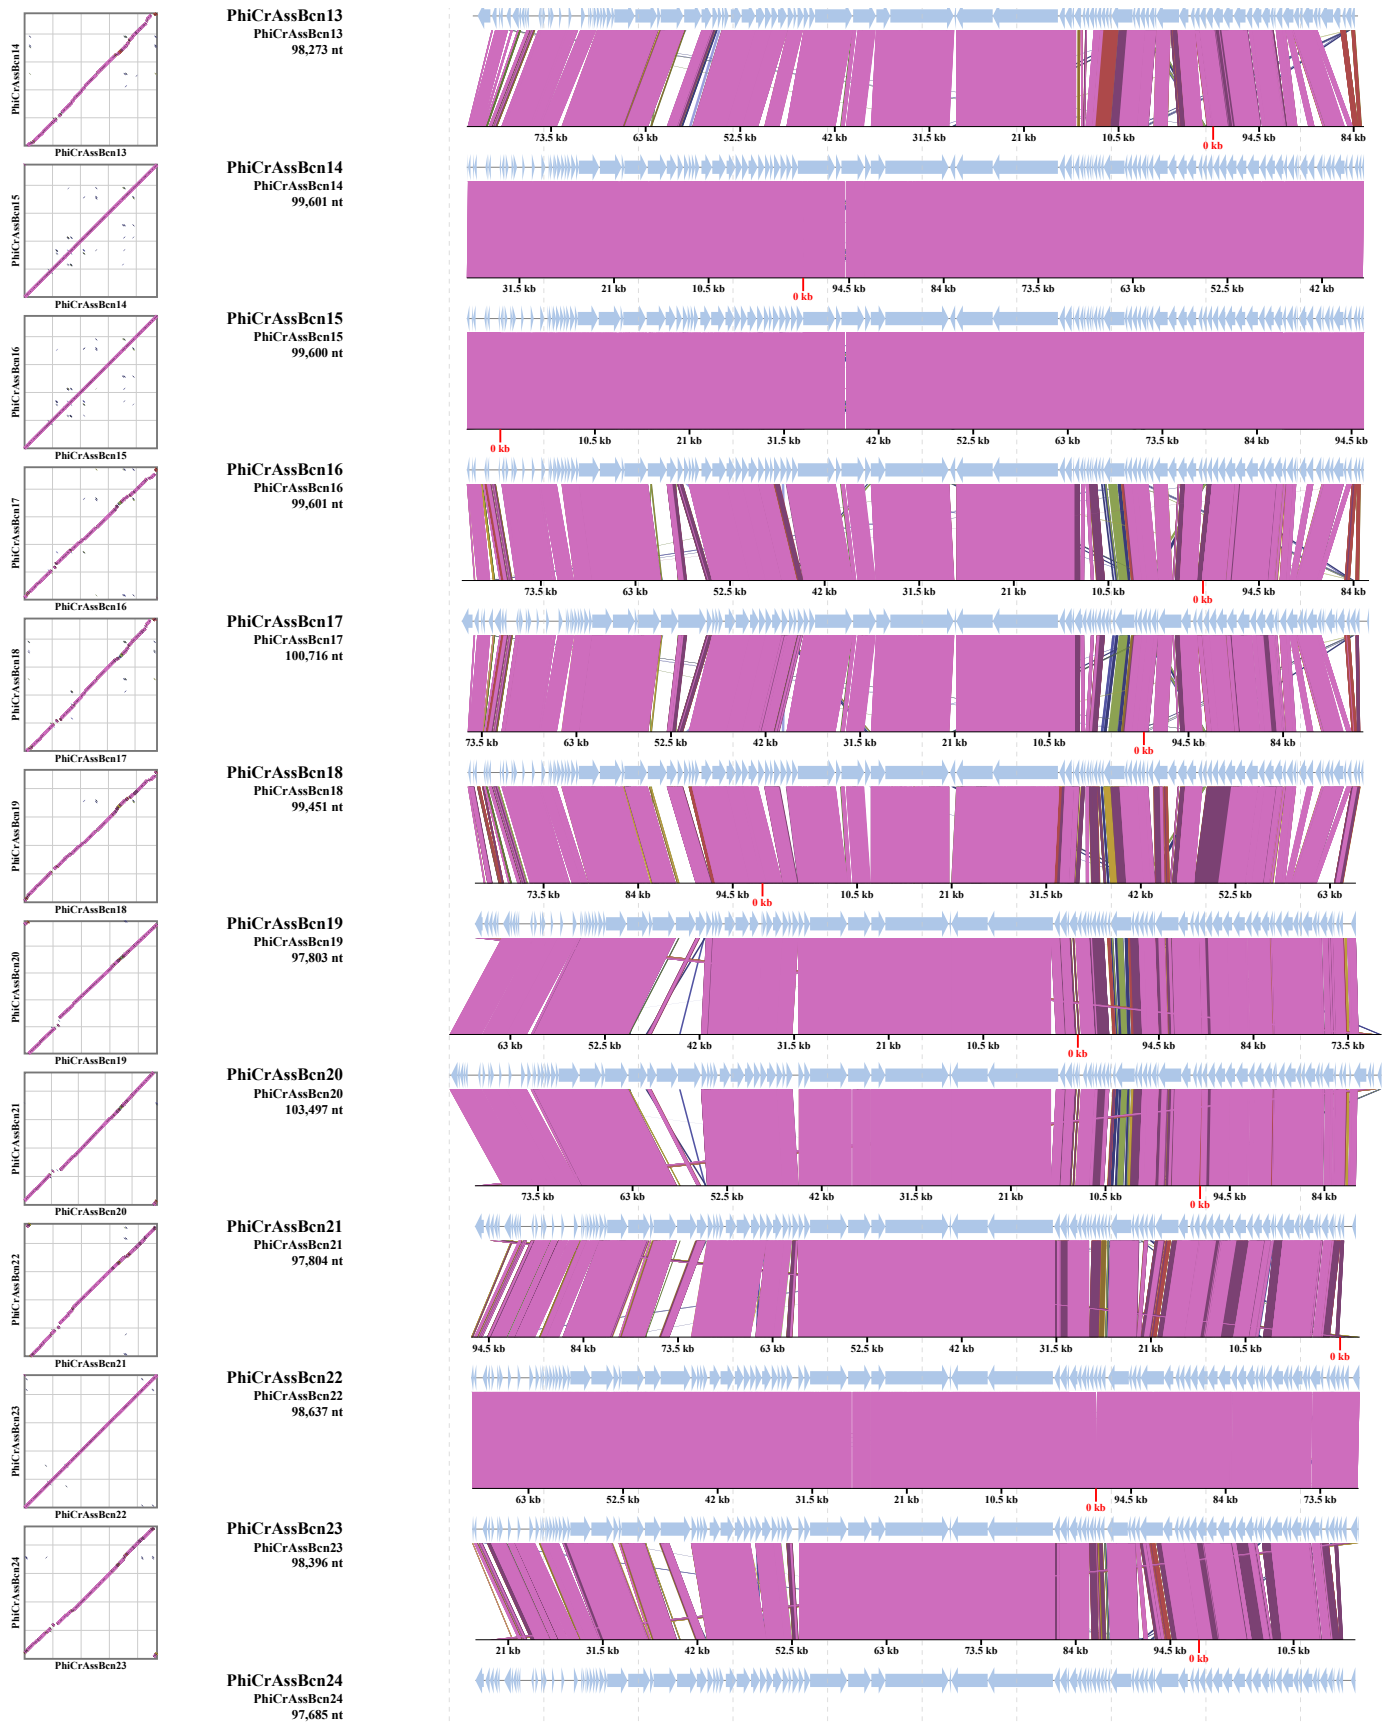

**Supplementary Figure 3. Multiple genome alignment of the 24 CrAssBcn phages .CDS** alignment of the 24 complete genomes and  $\Phi$ CrAss001. Left charts show pairwise alignment of two consecutive genomes. Light blue arrows in the genetic maps (right side) indicate the ORFs in each genome. The color of the bands between the genetic maps shows the percentage of identity between each sequence as indicated in the legend at the top of the figure.



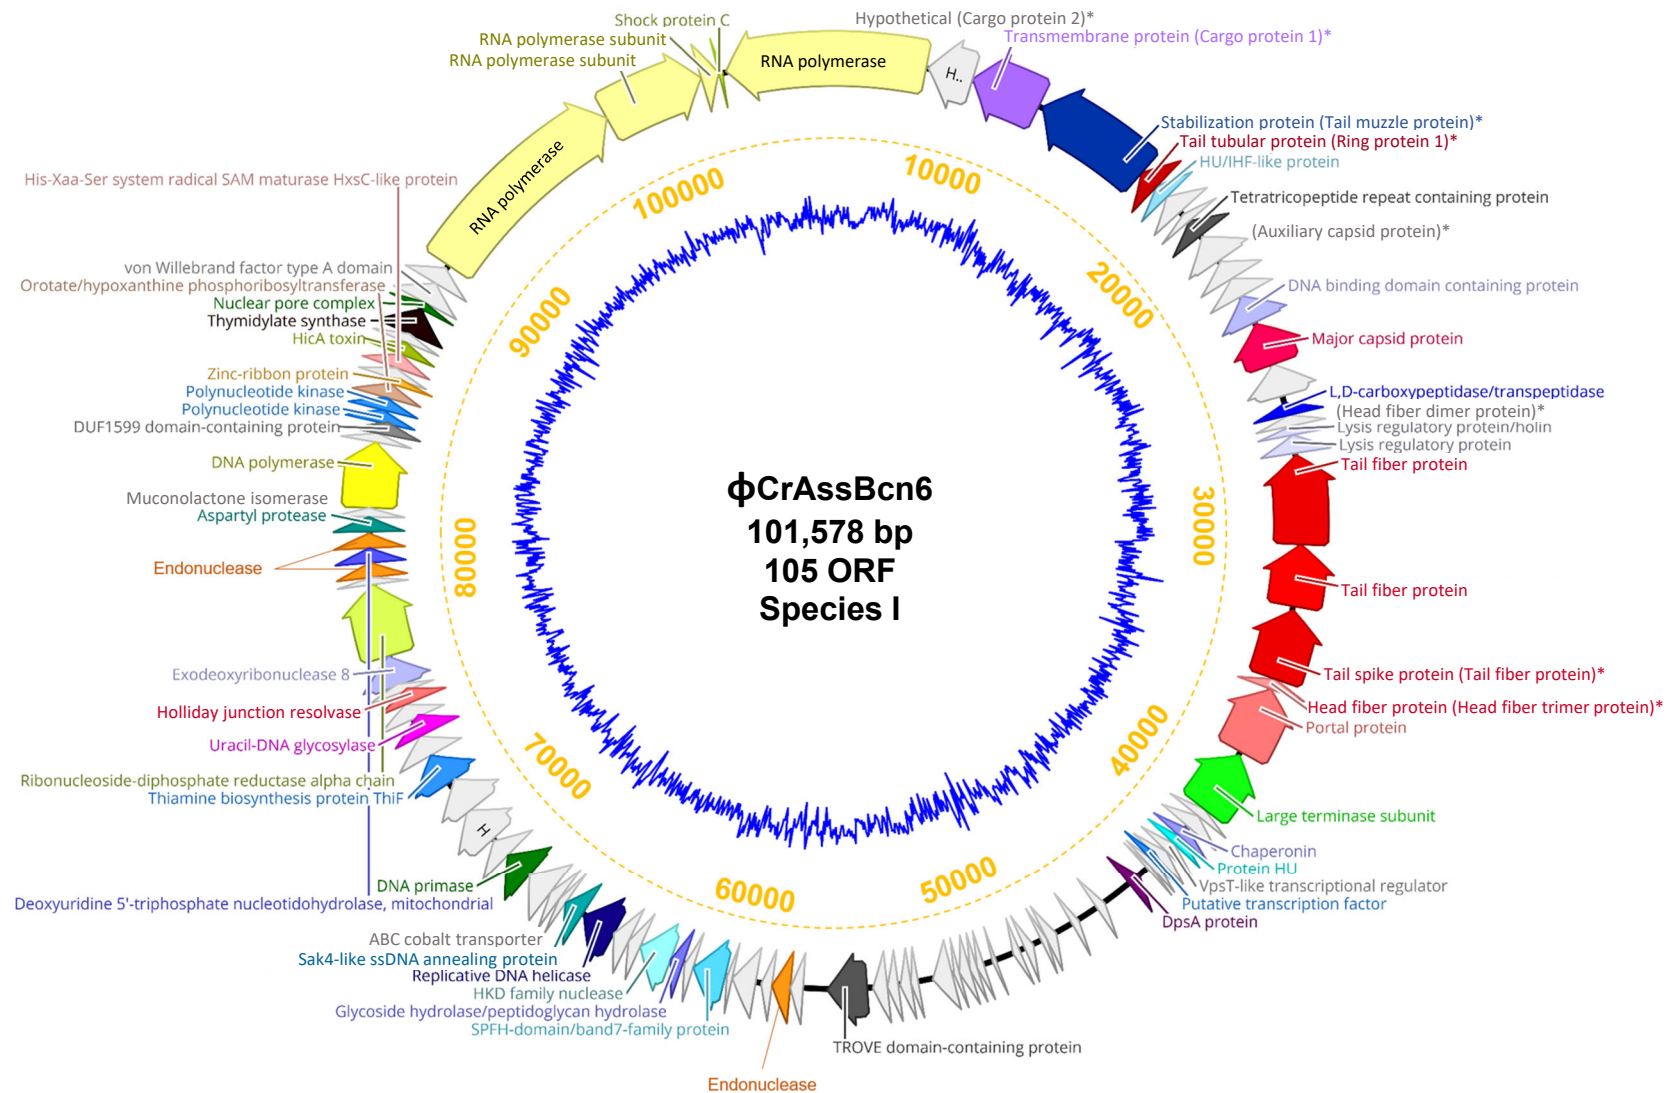

**Supplementary Fig. 4. Circular genomic map of ΦCrAssBcn6. Genomic map of the representative phage of the most abundant species (group I) among the crAssBcn phages.** The map was generated using Geneious Prime 2022.0.2. Different colored arrows show the predicted ORFs: yellow, with replicative functions; red, structural genes; orange, endonucleases; and grey, hypothetical proteins. The orange dashed ring indicates the genome position, and the inner blue ring displays the variations in the % Guanine/Cytosine. (\*) In brackets the ORFs with new annotation reported in Bayfield *et al.*, 2022.

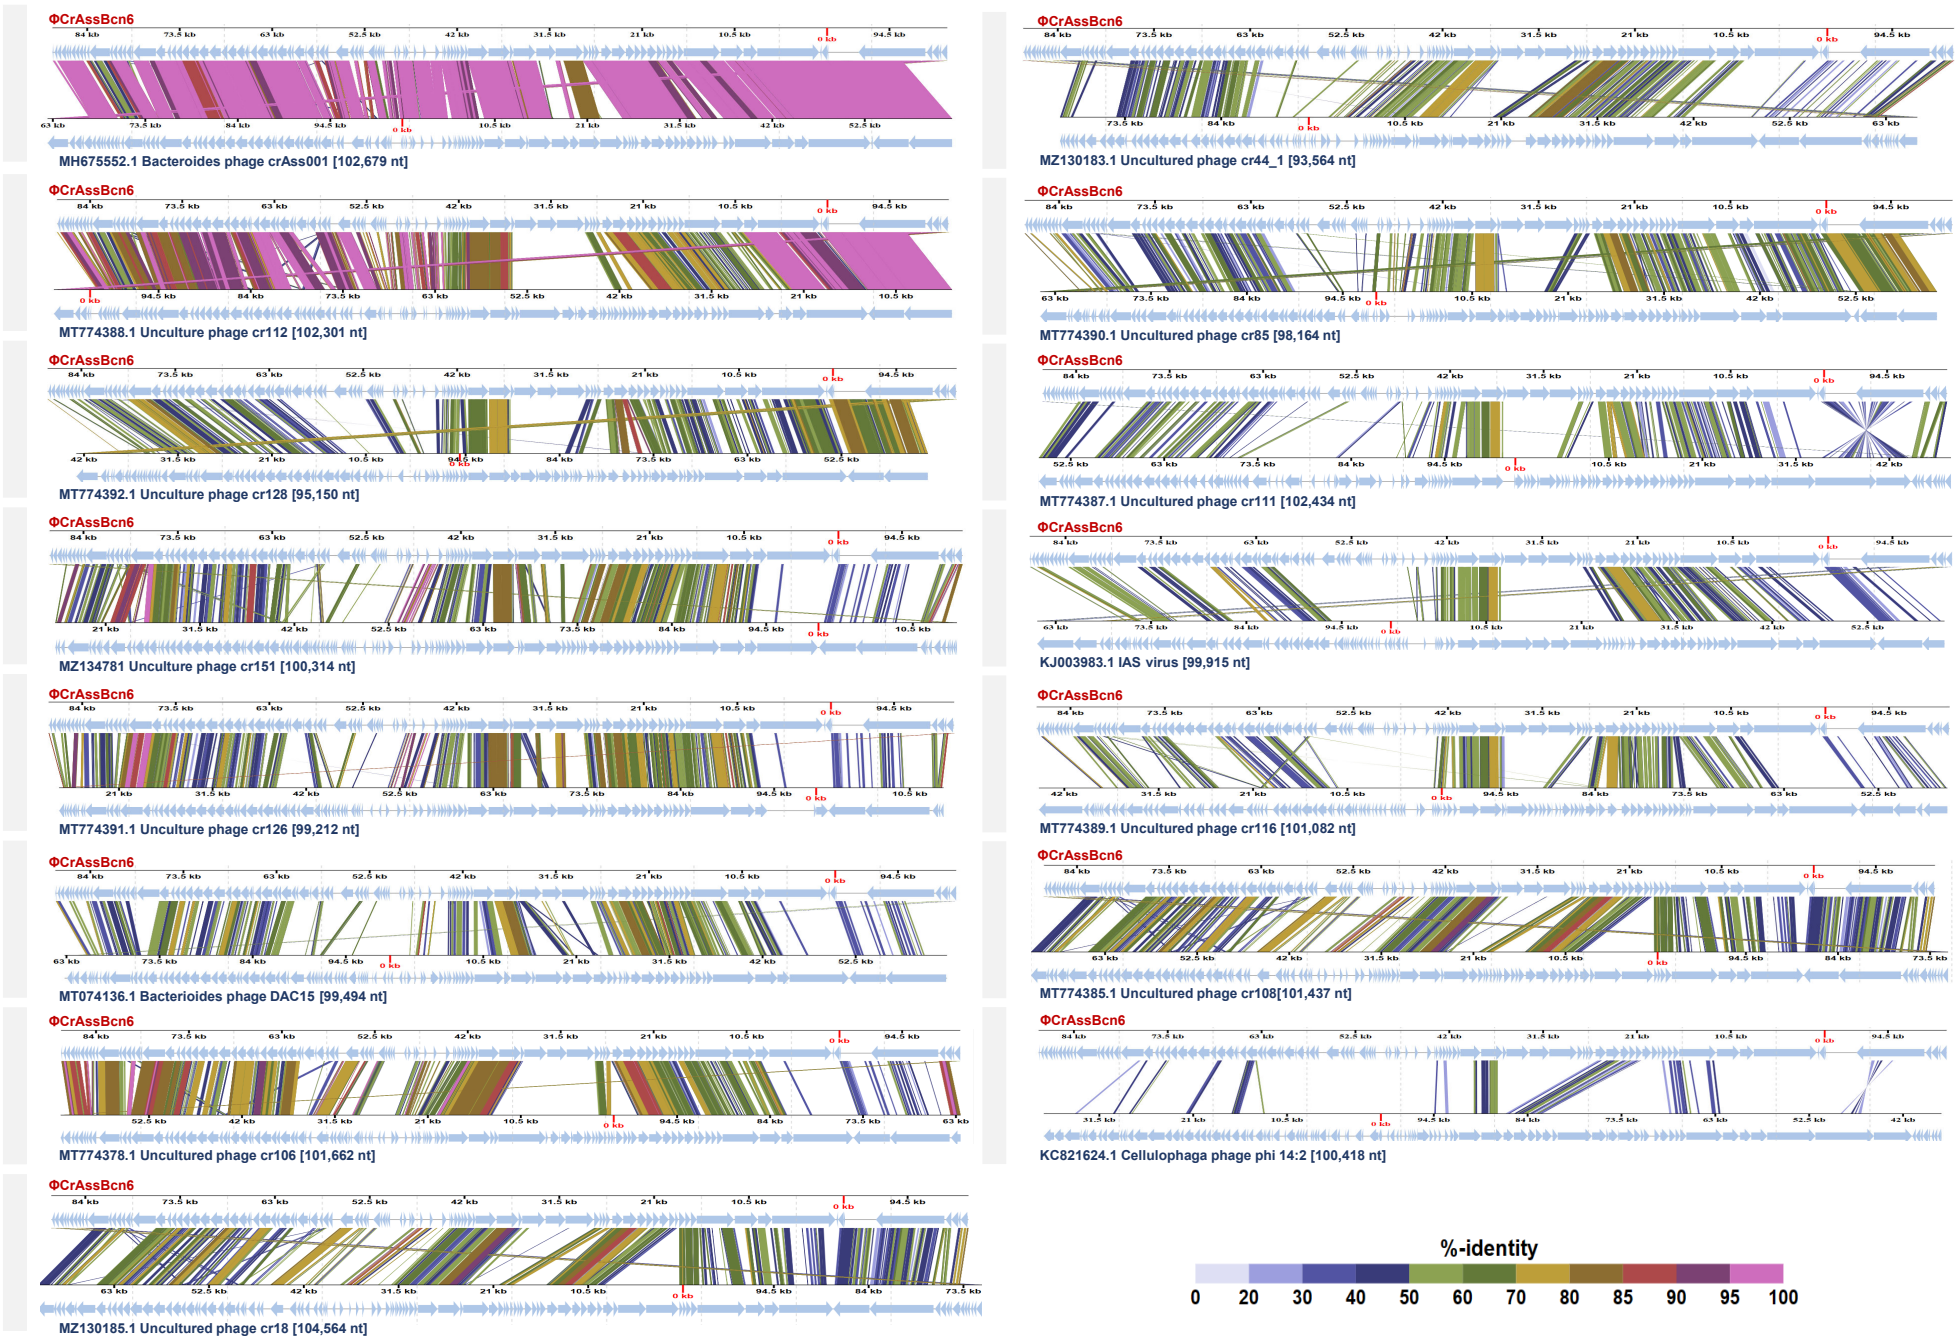

**Supplementary Figure 5. Genetic identity of  $\Phi$ CrAssBcn6 with phages of *Steigviridae* family.** CDS alignment of the genome of phage  $\Phi$ CrAssBcn6 with each one of the 15 crAss-like phage genomes assigned as species of the *Steigviridae* family. Light blue arrows indicate the ORFs in each genome. The color of the bands between the seven genetic maps shows the percentage of identity between each sequence as indicated in the legend at the bottom of the figure.

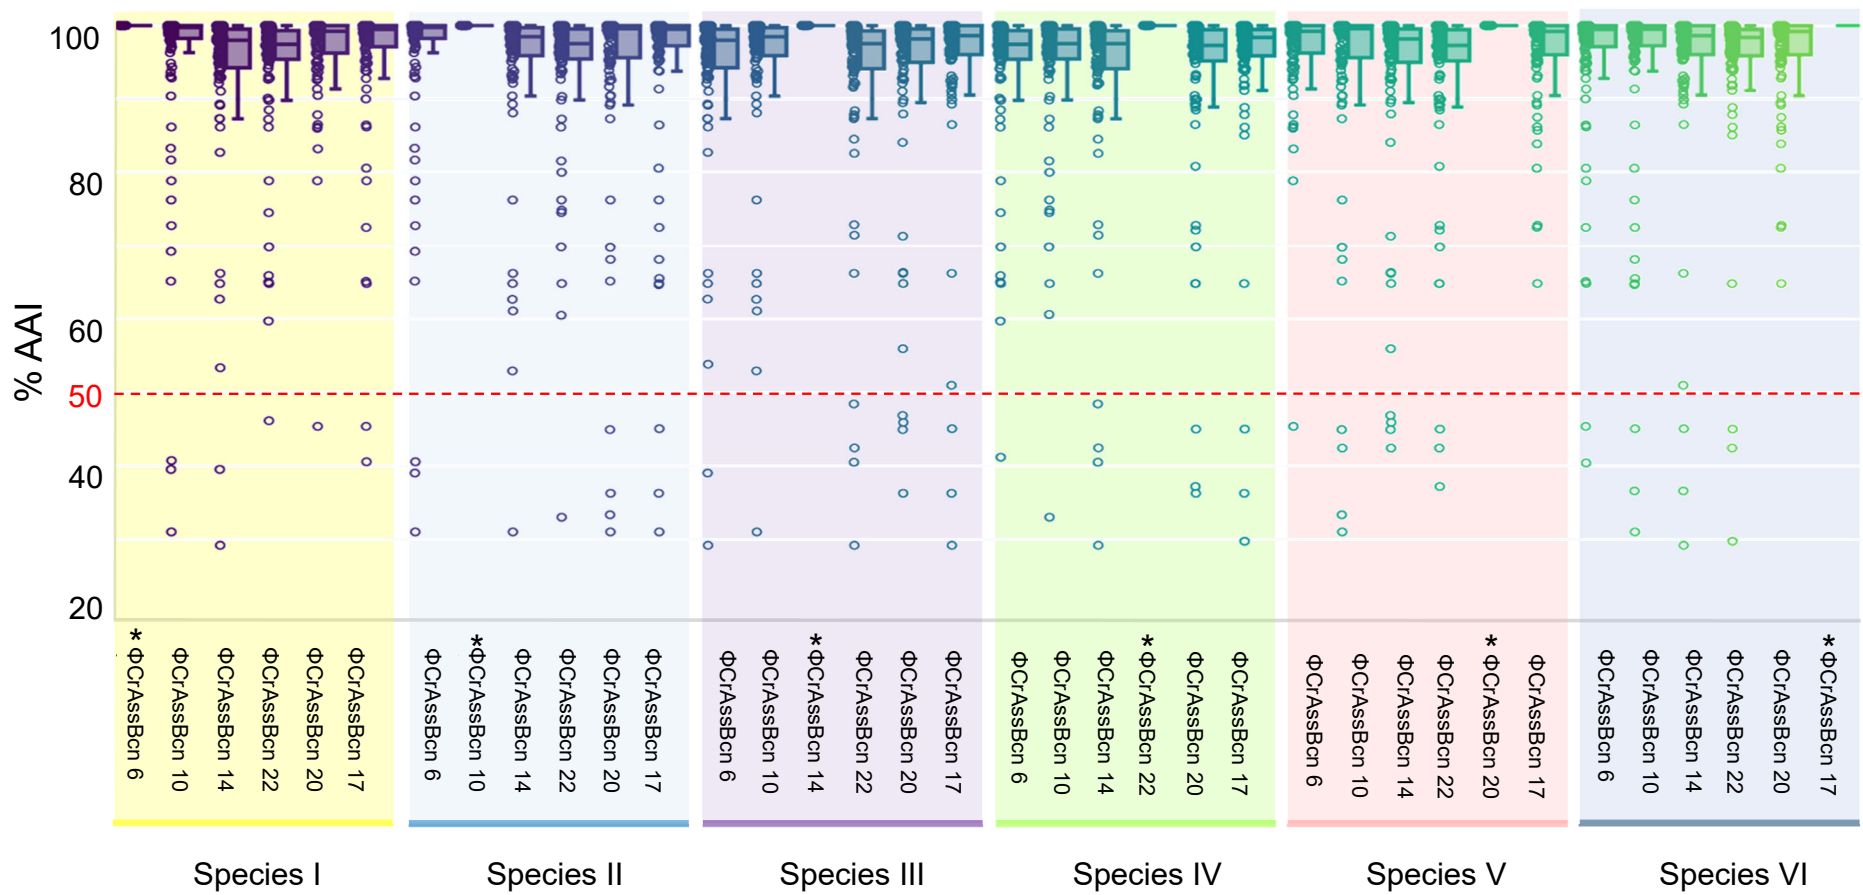

**Supplementary Fig. 6. Comparison of the ORFs performed by reciprocal best match of the crAssBcn phages.** The boxplot shows the percentage of amino acid identity (% AAI) of all ORFs comparing the representative crAssBcn phage of each species (marked with an \*) with those of the other seven species (I-VI). (N° ORFs for species I = 106, N for species II = 104, N for species III = 114 and N for species IV, V and VI = 105). The ORFs in the boxplots and upper circles have the highest % AAI and therefore the least variability among the phages. Central line of each boxplot represents the average value of the positive samples, the upper box include samples whose values are within the 75th percentile, and those in the lower white boxes are within the 25th percentile. The ORFs with higher variability correspond to the circles below 50 % (dotted red line). Source data are provided in Supplementary Data 2.



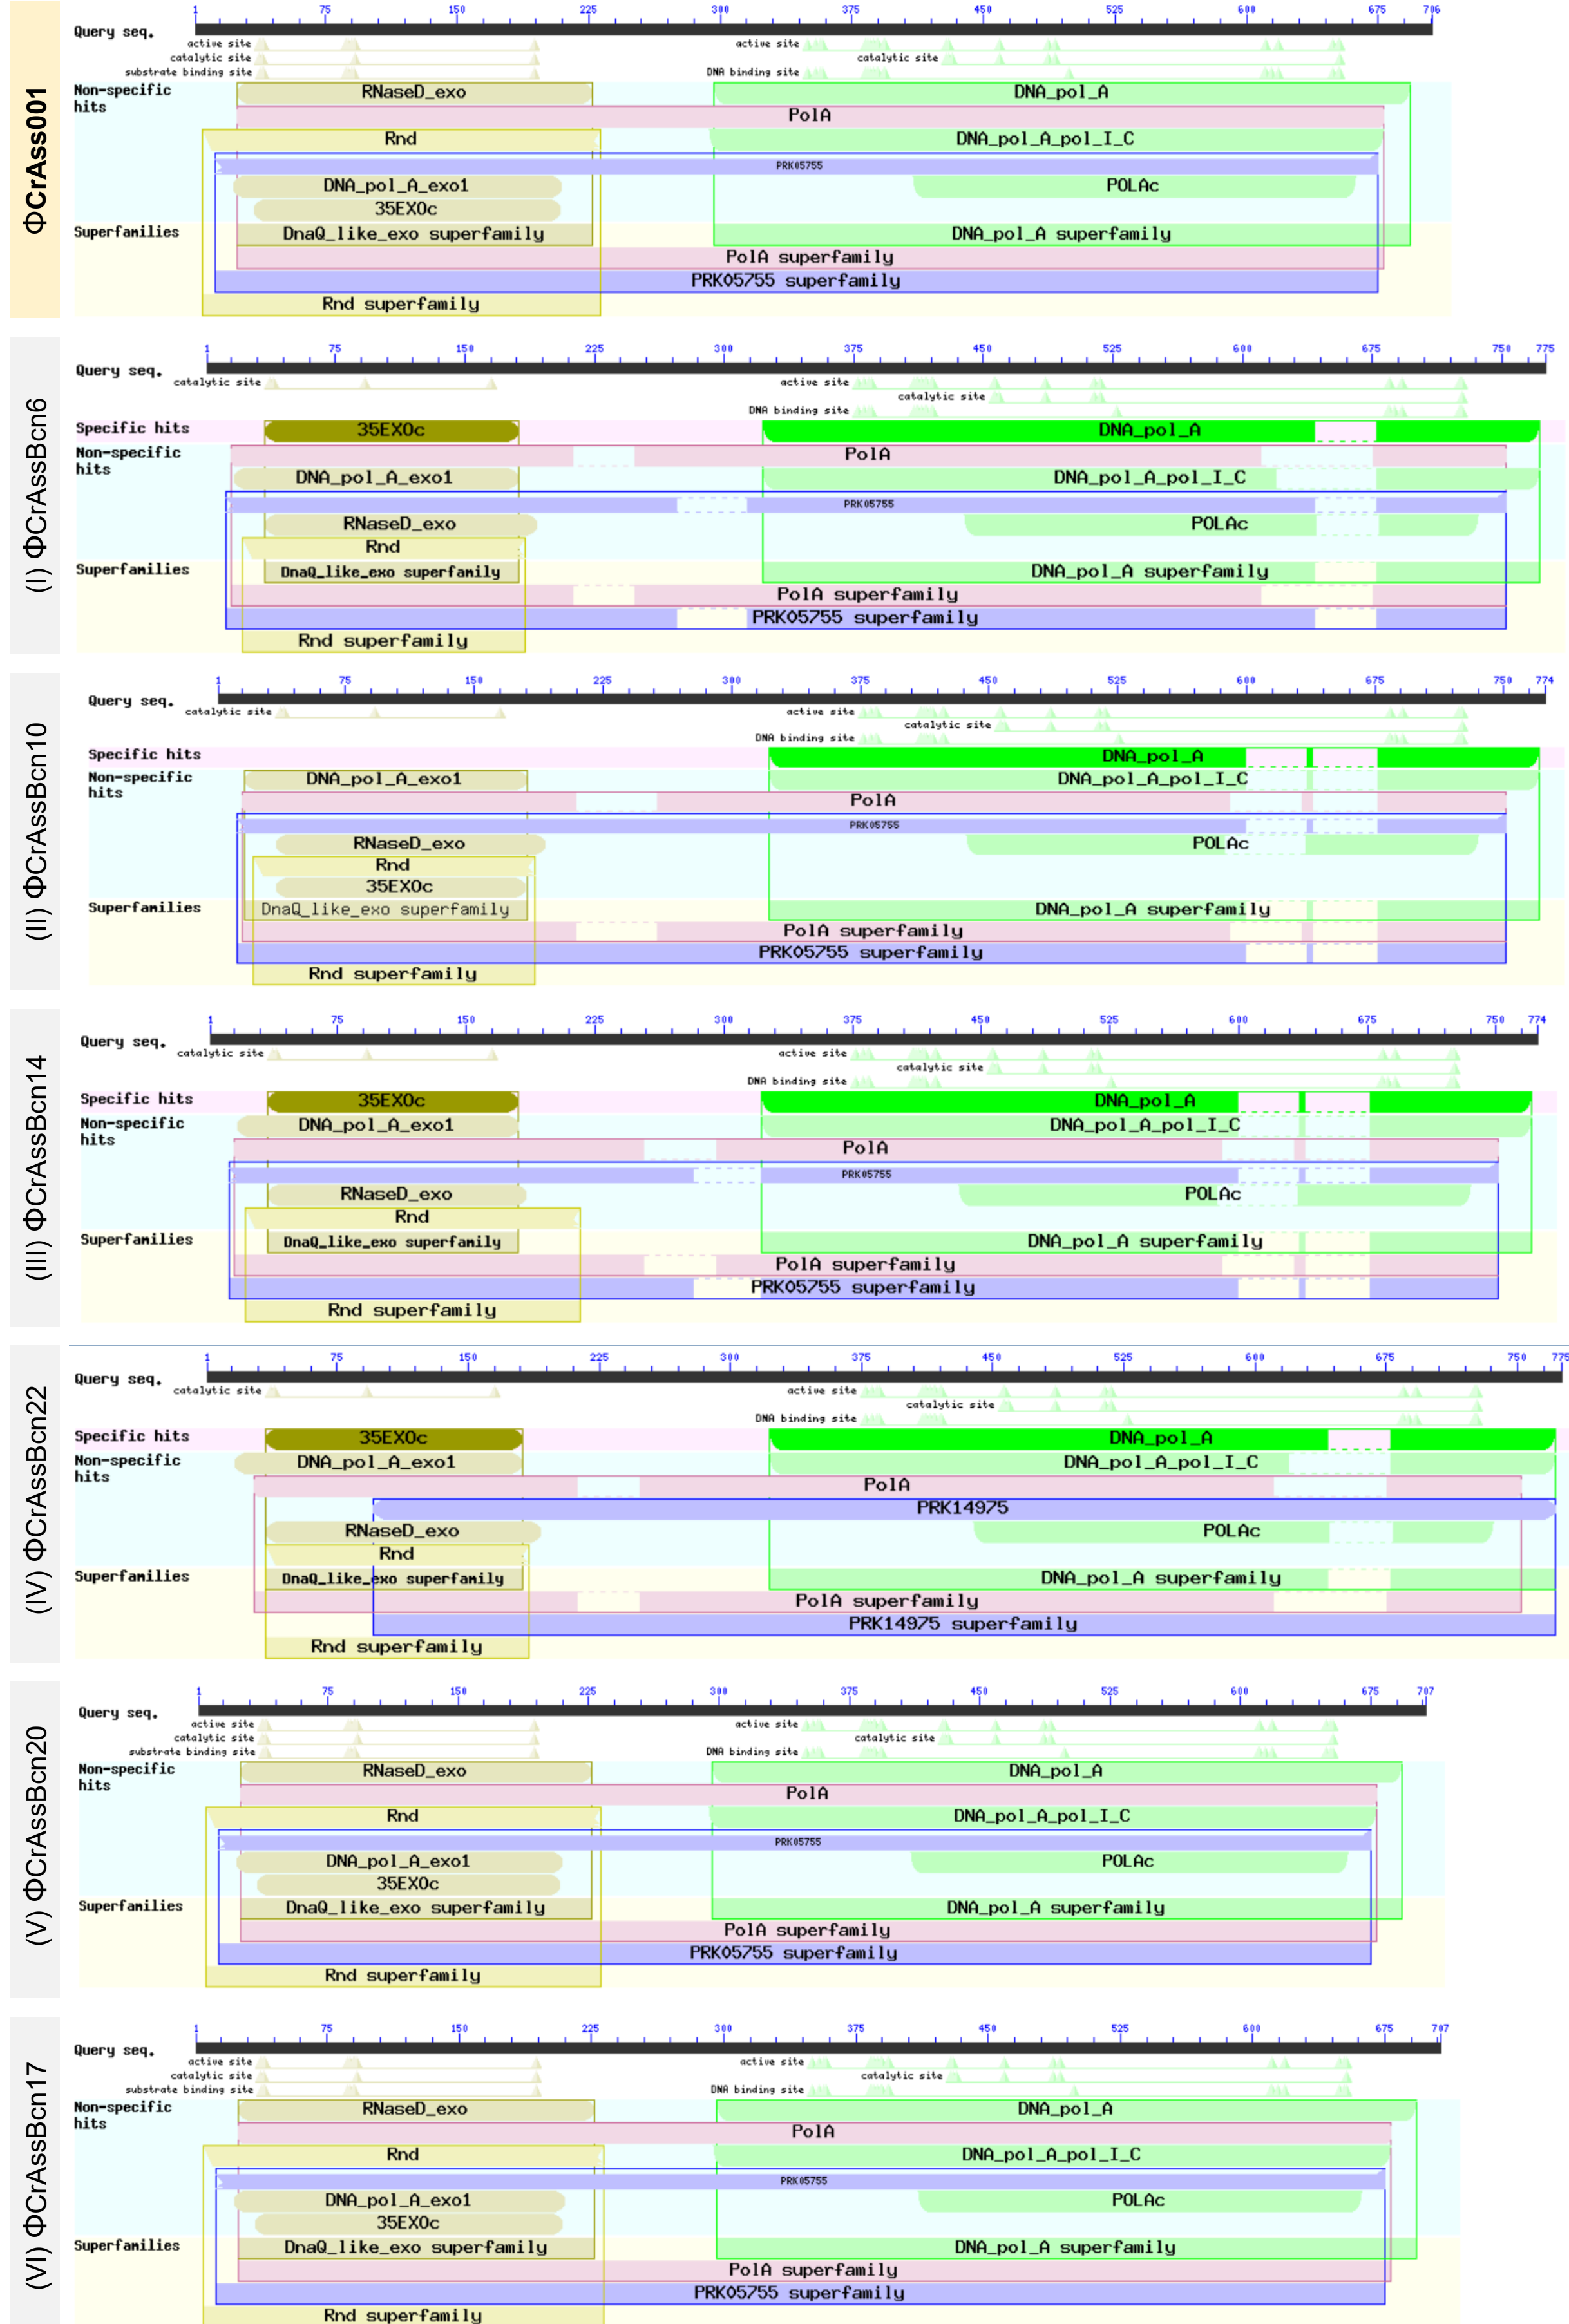

**Supplementary Fig. 7. Conserved domains of the polymerase A of crAssBcn phages.** Conserved domains of the product encoded in the ORF corresponding to polymerase A of each of the six crAssBcn phages representative of species I-VI. From top to bottom each chart shows first the length of the protein. Small triangles indicate the aminoacids involved in conserved active, catalytic and DNA binding sites of each domain. Colored bars show the closest hits found in the CDD for each domain are presented, these can be specific hits (with a high confident association) or non-specific and the superfamily to which the highest-ranking hit belongs.

## crAssBcn phage genomes

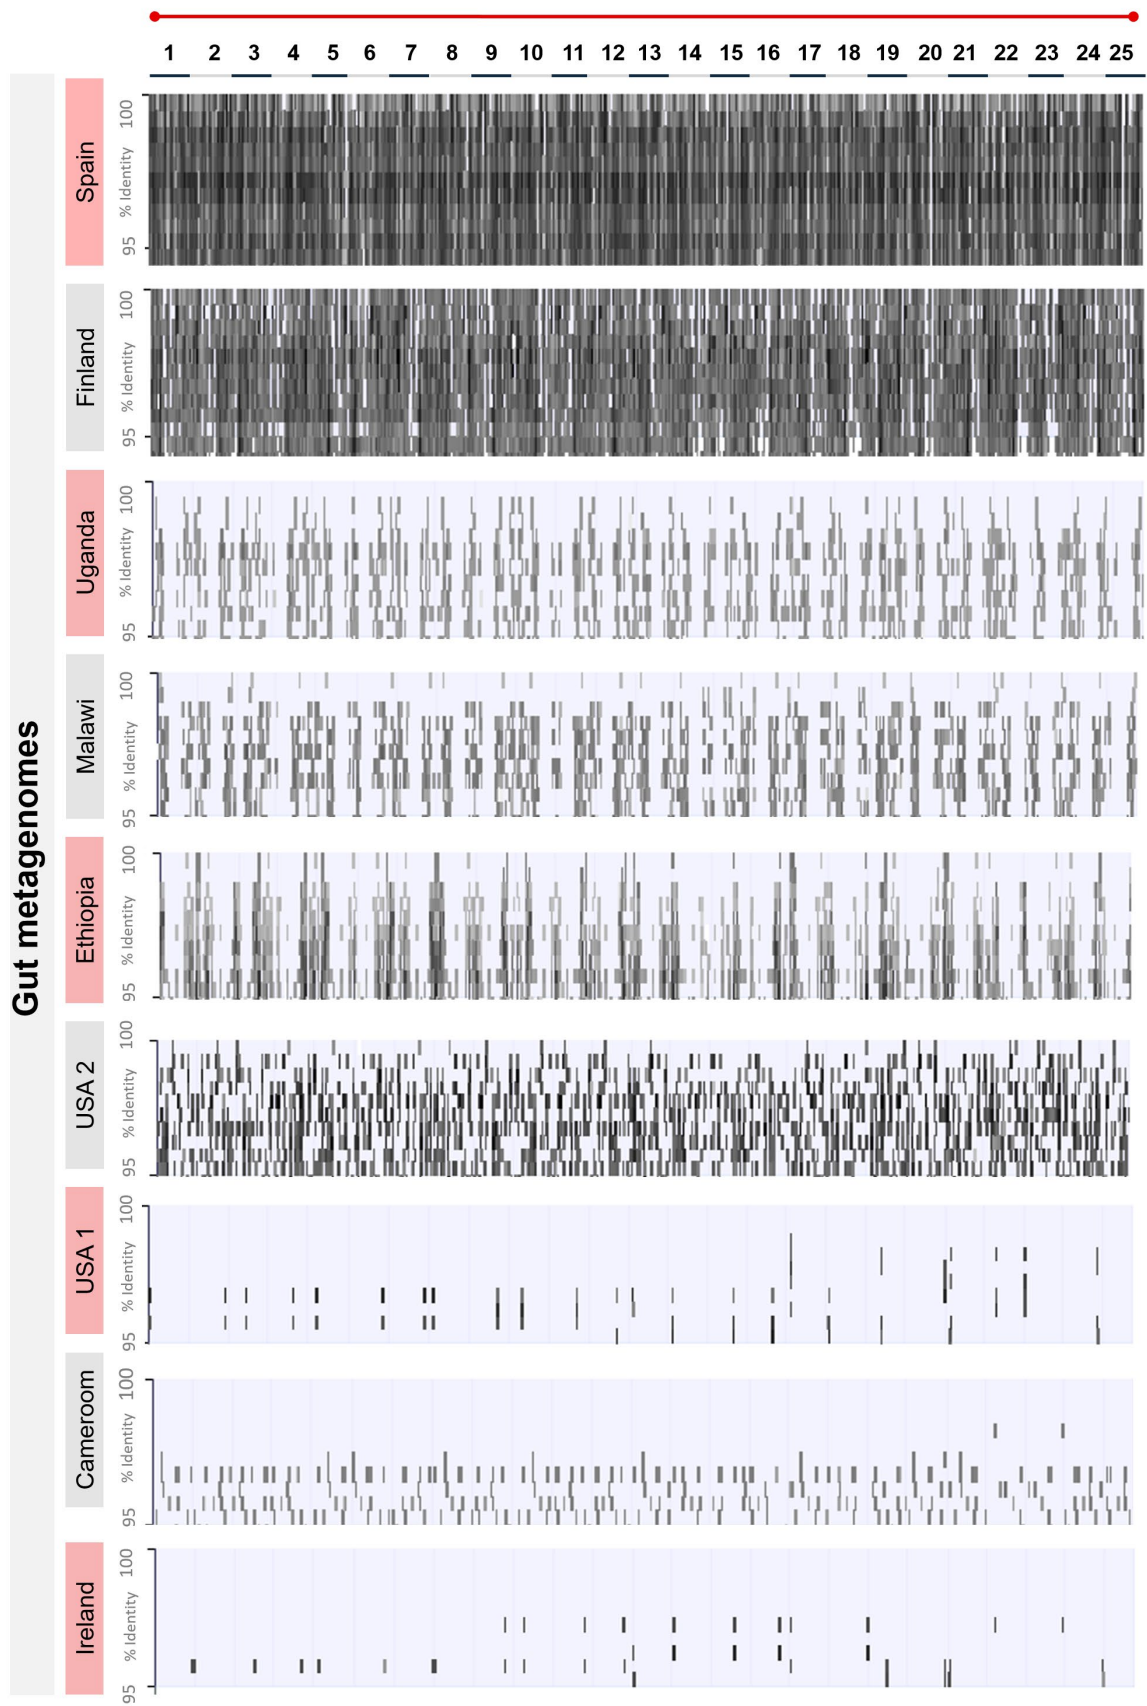

**Supplementary Fig. 8. Recruitment plots of crAssBcn phages mapping in gut viral communities from different countries.** This figure showcases the results of a BLASTn search of metagenomic short reads against crAssBcn phage genomes (X-axis). The upper panel shows the crAssBcn phage genomes. Bars lower than the average represent regions with fewer mapped reads. The panel for the metagenome of each country represents the reads recruited for each phage, where the X-axis shows mapped reads and the Y-axis the percent identity (from 95 to 100 % of identity).

**Supplementary Table 1-** Evaluation of crAss-like phages in wastewater samples and after three consecutive propagations in *B. intestinalis* enrichment cultures. Values are expressed in Ct and in brackets are the estimated number of GC/ml, that corresponds to the number of CrAss-like phage viral particles.

| WWTP                   | Ct<br>(GC/ml)               |                             |                              |                             | CrAss-like<br>phage*<br>pfu/ml | Isolate                                                                 |
|------------------------|-----------------------------|-----------------------------|------------------------------|-----------------------------|--------------------------------|-------------------------------------------------------------------------|
|                        | Initial<br>sample           | 1rst<br>propagation         | 2nd<br>propagation           | 3rd<br>propagation          |                                |                                                                         |
| Besos 1                | 28.96<br>(10 <sup>4</sup> ) | 32.42<br>(10 <sup>3</sup> ) | 17.95<br>(10 <sup>8</sup> )  | n.a                         | 6.0·10 <sup>7</sup>            | ΦCrAssBcn1                                                              |
| Besos 2                | 31.95<br>(10 <sup>4</sup> ) | 24.96<br>(10 <sup>6</sup> ) | 13.22<br>(10 <sup>9</sup> )  | n.a                         | 2.0·10 <sup>8</sup>            | ΦCrAssBcn2                                                              |
| Besos 3                | 30.76<br>(10 <sup>4</sup> ) | 26.74<br>(10 <sup>5</sup> ) | 14.09<br>(10 <sup>9</sup> )  | n.a                         | 1.0·10 <sup>9</sup>            | ΦCrAssBcn3                                                              |
| Gava 1                 | 29.18<br>(10 <sup>4</sup> ) | 25.16<br>(10 <sup>6</sup> ) | 14.78<br>(10 <sup>8</sup> )  | 13.28<br>(10 <sup>9</sup> ) | 3.9·10 <sup>8</sup>            | ΦCrAssBcn4<br>ΦCrAssBcn5<br>ΦCrAssBcn6<br>ΦCrAssBcn7<br>ΦCrAssBcn8      |
| Gava 2                 | 28.37<br>(10 <sup>5</sup> ) | 30.84<br>(10 <sup>4</sup> ) | 33.81<br>(10 <sup>3</sup> )  | 33.22<br>(10 <sup>3</sup> ) | n.a                            | -                                                                       |
| Igualada 1             | 30.44<br>(10 <sup>4</sup> ) | 24.98<br>(10 <sup>6</sup> ) | 12.03<br>(10 <sup>9</sup> )  | 13.60<br>(10 <sup>9</sup> ) | 4.4·10 <sup>9</sup>            | ΦCrAssBcn9<br>ΦCrAssBcn10<br>ΦCrAssBcn11<br>ΦCrAssBcn12<br>ΦCrAssBcn13  |
| Igualada 2             | 30.03<br>(10 <sup>4</sup> ) | 34.16<br>(10 <sup>3</sup> ) | 34.09<br>(10 <sup>3</sup> )  | 34.59<br>(10 <sup>3</sup> ) | n.a                            | -                                                                       |
| Manresa 1              | 31.24<br>(10 <sup>4</sup> ) | 25.81<br>(10 <sup>5</sup> ) | 10.70<br>(10 <sup>10</sup> ) | 14.21<br>(10 <sup>9</sup> ) | 1.4·10 <sup>9</sup>            | ΦCrAssBcn14<br>ΦCrAssBcn15<br>ΦCrAssBcn16<br>ΦCrAssBcn17<br>ΦCrAssBcn18 |
| Manresa 2              | 30.32<br>(10 <sup>4</sup> ) | 33.40<br>(10 <sup>3</sup> ) | 33.45<br>(10 <sup>3</sup> )  | 31.62<br>(10 <sup>4</sup> ) | n.a                            | -                                                                       |
| Prat de<br>Llobregat 1 | 31.18<br>(10 <sup>4</sup> ) | 30.02<br>(10 <sup>4</sup> ) | 13.92<br>(10 <sup>9</sup> )  | 14.28<br>(10 <sup>9</sup> ) | 2.8·10 <sup>9</sup>            | ΦCrAssBcn19<br>ΦCrAssBcn20<br>ΦCrAssBcn21                               |
| Prat de<br>Llobregat 2 | 32.98<br>(10 <sup>3</sup> ) | 21.02<br>(10 <sup>7</sup> ) | 13.89<br>(10 <sup>9</sup> )  | 13.54<br>(10 <sup>9</sup> ) | 8.0·10 <sup>8</sup>            | ΦCrAssBcn22<br>ΦCrAssBcn23                                              |
| Prat de<br>Llobregat 3 | 32.98<br>(10 <sup>3</sup> ) | 23.31<br>(10 <sup>6</sup> ) | 14.72<br>(10 <sup>8</sup> )  | n.a                         | 1.8·10 <sup>8</sup>            | ΦCrAssBcn24<br>ΦCrAssBcn25                                              |

\*Detected by plaque blot hybridization on plates from the last propagation step.

n.a: not analyzed

WWTP: wastewater treatment plant

**Supplementary Table 2.-** Bacterial strains used in this study.

| Bacteria                    | Strain           | Characteristics                                     | Reference/source          |
|-----------------------------|------------------|-----------------------------------------------------|---------------------------|
| <i>Bacteroides fragilis</i> | RYC2056          | Clinical isolate                                    | 1                         |
| <i>Bacteroides fragilis</i> | HSP40            | Clinical isolate                                    | 2                         |
| <i>Bacteroides sp.</i>      | GB105            | Municipal wastewater isolate. UK                    | Our collection            |
| <i>Bacteroides fragilis</i> | GB124            | Municipal wastewater isolate. UK                    | 3                         |
| <i>Bacteroides fragilis</i> | GB307            | Municipal wastewater isolate. UK                    | 4                         |
| <i>Bacteroides fragilis</i> | GB331            | Municipal wastewater isolate. UK                    | 4                         |
| <i>Bacteroides fragilis</i> | GB135            | Municipal wastewater isolate. UK                    | 4                         |
| <i>Bacteroides fragilis</i> | NCTC 9343        | Appendix abscess isolate                            | 5                         |
| <i>Bacteroides fragilis</i> | 3156             | Abscess isolate                                     | 6                         |
| <i>Bacteroides fragilis</i> | DSM 2079         | Human faeces isolate                                | 7                         |
| <i>Bacteroides fragilis</i> | C13525           | Clinical isolate                                    | 2                         |
| <i>Bacteroides fragilis</i> | ATCC 23745       | Pleural fluid isolate                               | 8                         |
| <i>Bacteroides fragilis</i> | C17898           | Clinical isolate                                    | 2                         |
| <i>Bacteroides fragilis</i> | C350             | Clinical isolate                                    | Our collection            |
| <i>Bacteroides fragilis</i> | C13182           | Clinical isolate                                    | 2                         |
| <i>Bacteroides fragilis</i> | D1416            | Clinical isolate                                    | 2                         |
| <i>Bacteroides fragilis</i> | 638R C17898      | Plasmid-free spontaneous rif <sup>R</sup> mutant    | 9                         |
| <i>Bacteroides fragilis</i> | SA208            | Municipal wastewater isolate. Barcelona             | Our collection            |
| <i>Bacteroides fragilis</i> | GA18             | Municipal wastewater isolate. Barcelona             | Our collection            |
| <i>Bacteroides fragilis</i> | Ø7               | Municipal wastewater isolate. Tarragona             | Our collection            |
| <i>Bacteroides fragilis</i> | PL122            | Municipal wastewater isolate. Tarragona             | 10                        |
| <i>Bacteroides fragilis</i> | 01-HSP           | Clinical isolate                                    | Provided by F. Navarro    |
| <i>Bacteroides fragilis</i> | 02-HSP           | Clinical isolate                                    | Provided by F. Navarro    |
| <i>Bacteroides fragilis</i> | 06-HSP           | Clinical isolate                                    | Provided by F. Navarro    |
| <i>Bacteroides fragilis</i> | 07-HSP           | Clinical isolate                                    | Provided by F. Navarro    |
| <i>Bacteroides fragilis</i> | 08-HSP           | Clinical isolate                                    | Provided by F. Navarro    |
| <i>Bacteroides fragilis</i> | 09-HSP           | Clinical isolate                                    | Provided by F. Navarro    |
| <i>Bacteroides fragilis</i> | 11-HSP           | Clinical isolate                                    | Provided by F. Navarro    |
| <i>Bacteroides fragilis</i> | $\Delta$ mpM44   | Constitutively expresses PSA                        | Provided by L.E. Comstock |
| <i>Bacteroides fragilis</i> | $\Delta$ tsr19M5 | Expresses extracellular polysaccharide EPS          | Provided by L.E. Comstock |
| <i>Bacteroides fragilis</i> | $\Delta$ tsr15M8 | Constitutively expresses an external protein operon | Provided by L.E. Comstock |



|                                     |                                             |                                                                                                                                  |                           |
|-------------------------------------|---------------------------------------------|----------------------------------------------------------------------------------------------------------------------------------|---------------------------|
| <i>Bacteroides fragilis</i>         | $\Delta$ tsr15M4                            | Does not express surface proteins that are constitutively expressed in the mutant $\Delta$ tsr15M8<br>Mutant of strain NCTC 9343 | Provided by L.E. Comstock |
| <i>Bacteroides fragilis</i>         | $\Delta$ mpiM44 $\Delta$ upaZ $\Delta$ upeZ | Constitutively expresses PSA, PSE and PSC. Mutant of strain NCTC 9343                                                            | Provided by L.E. Comstock |
| <i>Bacteroides fragilis</i>         | $\Delta$ PSA                                | Overexpresses PSA. Mutant of strain NCTC 9343                                                                                    | 11                        |
| <i>Bacteroides fragilis</i>         | $\Delta$ ungD1 $\Delta$ ungD2               | Expresses PSH. Mutant of strain NCTC 9343                                                                                        | Provided by L.E. Comstock |
| <i>Bacteroides fragilis</i>         | $\Delta$ PSC                                | Overexpresses PSC. Mutant of strain NCTC 9343                                                                                    | Provided by L.E. Comstock |
| <i>Bacteroides fragilis</i>         | $\Delta$ tsr19M3                            | Does not express EPS. Mutant of strain NCTC 9343                                                                                 | Provided by L.E. Comstock |
| <i>Bacteroides thetaiotaomicron</i> | GA17                                        | Municipal wastewater isolate. Barcelona                                                                                          | 12                        |
| <i>Bacteroides thetaiotaomicron</i> | ATCC 29741                                  | Perforated appendix isolate                                                                                                      | 13                        |
| <i>Bacteroides thetaiotaomicron</i> | HB13                                        | Municipal wastewater isolate. Colombia                                                                                           | 12                        |
| <i>Bacteroides thetaiotaomicron</i> | SA1610                                      | Municipal wastewater isolate. Barcelona                                                                                          | 12                        |
| <i>Bacteroides thetaiotaomicron</i> | 04-HSP                                      | Clinical isolate                                                                                                                 | Provided by F. Navarro    |
| <i>Parabacteroides distasonis</i>   | ATCC 8503                                   | Human faeces isolate                                                                                                             | 14                        |
| <i>Bacteroides ovatus</i>           | 03-HSP                                      | Clinical isolate                                                                                                                 | Provided by F. Navarro    |
| <i>Bacteroides ovatus</i>           | 05-HSP                                      | Clinical isolate                                                                                                                 | Provided by F. Navarro    |
| <i>Bacteroides ovatus</i>           | 10-HSP                                      | Clinical isolate                                                                                                                 | Provided by F. Navarro    |
| <i>Bacteroides intestinalis</i>     | DSM 108646                                  | Human faeces isolate                                                                                                             | 15                        |

**Supplementary Table 3.-** Genome characteristics of the 25 crAssBcn phages in this study, Species group and GenBank accession numbers

| Phage        | Length (bp) | Complete genome | % GC  | N° ORFs | Species group | GenBank Accession number | Hyperlink                                                                                                 |
|--------------|-------------|-----------------|-------|---------|---------------|--------------------------|-----------------------------------------------------------------------------------------------------------|
| ΦCrAssBcn1   | 99312       | Yes             | 35.07 | 102     | 1             | OQ221536                 | <a href="https://www.ncbi.nlm.nih.gov/nuccore/OQ221536">https://www.ncbi.nlm.nih.gov/nuccore/OQ221536</a> |
| ΦCrAssBcn2   | 99311       | Yes             | 35.07 | 102     | 1             | OQ221537                 | <a href="https://www.ncbi.nlm.nih.gov/nuccore/OQ221537">https://www.ncbi.nlm.nih.gov/nuccore/OQ221537</a> |
| ΦCrAssBcn3   | 99312       | Yes             | 35.07 | 102     | 1             | OQ221538                 | <a href="https://www.ncbi.nlm.nih.gov/nuccore/OQ221538">https://www.ncbi.nlm.nih.gov/nuccore/OQ221538</a> |
| ΦCrAssBcn4   | 101446      | Yes             | 35.18 | 103     | 1             | OQ221539                 | <a href="https://www.ncbi.nlm.nih.gov/nuccore/OQ221539">https://www.ncbi.nlm.nih.gov/nuccore/OQ221539</a> |
| ΦCrAssBcn5   | 101573      | Yes             | 35.18 | 105     | 1             | OQ221540                 | <a href="https://www.ncbi.nlm.nih.gov/nuccore/OQ221540">https://www.ncbi.nlm.nih.gov/nuccore/OQ221540</a> |
| ΦCrAssBcn6*  | 101578      | Yes             | 35.18 | 105     | 1             | OQ221541                 | <a href="https://www.ncbi.nlm.nih.gov/nuccore/OQ221541">https://www.ncbi.nlm.nih.gov/nuccore/OQ221541</a> |
| ΦCrAssBcn7   | 101577      | Yes             | 35.18 | 105     | 1             | OQ221542                 | <a href="https://www.ncbi.nlm.nih.gov/nuccore/OQ221542">https://www.ncbi.nlm.nih.gov/nuccore/OQ221542</a> |
| ΦCrAssBcn8   | 101575      | Yes             | 35.17 | 105     | 1             | OQ221543                 | <a href="https://www.ncbi.nlm.nih.gov/nuccore/OQ221543">https://www.ncbi.nlm.nih.gov/nuccore/OQ221543</a> |
| ΦCrAssBcn9   | 99752       | Yes             | 35.08 | 104     | 2             | OQ221544                 | <a href="https://www.ncbi.nlm.nih.gov/nuccore/OQ221544">https://www.ncbi.nlm.nih.gov/nuccore/OQ221544</a> |
| ΦCrAssBcn10* | 99753       | Yes             | 35.08 | 104     | 2             | OQ221545                 | <a href="https://www.ncbi.nlm.nih.gov/nuccore/OQ221545">https://www.ncbi.nlm.nih.gov/nuccore/OQ221545</a> |
| ΦCrAssBcn11  | 99752       | Yes             | 35.08 | 104     | 2             | OQ221546                 | <a href="https://www.ncbi.nlm.nih.gov/nuccore/OQ221546">https://www.ncbi.nlm.nih.gov/nuccore/OQ221546</a> |
| ΦCrAssBcn12  | 99750       | Yes             | 35.08 | 103     | 2             | OQ221547                 | <a href="https://www.ncbi.nlm.nih.gov/nuccore/OQ221547">https://www.ncbi.nlm.nih.gov/nuccore/OQ221547</a> |
| ΦCrAssBcn13  | 98273       | Yes             | 35.19 | 101     | 2             | OQ221548                 | <a href="https://www.ncbi.nlm.nih.gov/nuccore/OQ221548">https://www.ncbi.nlm.nih.gov/nuccore/OQ221548</a> |
| ΦCrAssBcn14* | 99601       | Yes             | 34.66 | 114     | 3             | OQ221549                 | <a href="https://www.ncbi.nlm.nih.gov/nuccore/OQ221549">https://www.ncbi.nlm.nih.gov/nuccore/OQ221549</a> |
| ΦCrAssBcn15  | 99600       | Yes             | 34.67 | 114     | 3             | OQ221550                 | <a href="https://www.ncbi.nlm.nih.gov/nuccore/OQ221550">https://www.ncbi.nlm.nih.gov/nuccore/OQ221550</a> |
| ΦCrAssBcn16  | 99601       | Yes             | 34.66 | 114     | 3             | OQ221551                 | <a href="https://www.ncbi.nlm.nih.gov/nuccore/OQ221551">https://www.ncbi.nlm.nih.gov/nuccore/OQ221551</a> |
| ΦCrAssBcn17* | 100716      | Yes             | 35.01 | 104     | 6             | OQ221552                 | <a href="https://www.ncbi.nlm.nih.gov/nuccore/OQ221552">https://www.ncbi.nlm.nih.gov/nuccore/OQ221552</a> |
| ΦCrAssBcn18  | 99451       | Yes             | 34.66 | 110     | 3             | OQ221553                 | <a href="https://www.ncbi.nlm.nih.gov/nuccore/OQ221553">https://www.ncbi.nlm.nih.gov/nuccore/OQ221553</a> |
| ΦCrAssBcn19  | 97803       | Yes             | 35.18 | 104     | 1             | OQ221554                 | <a href="https://www.ncbi.nlm.nih.gov/nuccore/OQ221554">https://www.ncbi.nlm.nih.gov/nuccore/OQ221554</a> |
| ΦCrAssBcn20* | 103497      | Yes             | 34.81 | 105     | 5             | OQ221555                 | <a href="https://www.ncbi.nlm.nih.gov/nuccore/OQ221555">https://www.ncbi.nlm.nih.gov/nuccore/OQ221555</a> |
| ΦCrAssBcn21  | 97804       | Yes             | 35.18 | 104     | 1             | OQ221556                 | <a href="https://www.ncbi.nlm.nih.gov/nuccore/OQ221556">https://www.ncbi.nlm.nih.gov/nuccore/OQ221556</a> |
| ΦCrAssBcn22* | 98637       | Yes             | 35.09 | 105     | 4             | OQ221557                 | <a href="https://www.ncbi.nlm.nih.gov/nuccore/OQ221557">https://www.ncbi.nlm.nih.gov/nuccore/OQ221557</a> |
| ΦCrAssBcn23  | 98396       | Yes             | 34.29 | 101     | 4             | OQ221558                 | <a href="https://www.ncbi.nlm.nih.gov/nuccore/OQ221558">https://www.ncbi.nlm.nih.gov/nuccore/OQ221558</a> |
| ΦCrAssBcn24  | 97685       | Yes             | 35.08 | 103     | 1             | OQ221559                 | <a href="https://www.ncbi.nlm.nih.gov/nuccore/OQ221559">https://www.ncbi.nlm.nih.gov/nuccore/OQ221559</a> |
| ΦCrAssBcn25  | 75754       | No              | 35.18 | 70      | -             | OQ221560                 | <a href="https://www.ncbi.nlm.nih.gov/nuccore/OQ221560">https://www.ncbi.nlm.nih.gov/nuccore/OQ221560</a> |

(\*) Species reference genome.

**Supplementary Table 4.** Complete non-redundant crAss-like phage genomes of family *Steigviridae* used in this study (<https://ictv.global/taxonomy>).

| Subfamily           | Genus               | Species                                | GenBank code | Description                       |       |
|---------------------|---------------------|----------------------------------------|--------------|-----------------------------------|-------|
| <i>Asinivirinae</i> | <i>Akihdevirus</i>  | <i>Akihdevirus balticus</i>            | KC821624     | <i>Cellulophaga</i> phage phi14:2 | dsDNA |
| <i>Asinivirinae</i> | <i>Kahnovirus</i>   | <i>Kahnovirus copri</i>                | MZ130483     | uncultured phage cr44_1           | dsDNA |
| <i>Asinivirinae</i> | <i>Kahnovirus</i>   | <i>Kahnovirus oralis</i>               | MT774390     | uncultured phage cr85_1           | dsDNA |
| <i>Asinivirinae</i> | <i>Kehishuvirus</i> | <i>Kehishuvirus splanchnicus</i>       | MT774388     | uncultured phage cr112_1          | dsDNA |
| <i>Asinivirinae</i> | <i>Kehishuvirus</i> | <i>Kehishuvirus primarius</i>          | MH675552     | <i>Bacteroides</i> phage CrAss001 | dsDNA |
| <i>Asinivirinae</i> | <i>Kolpuevirus</i>  | <i>Kolpuevirus coli</i>                | MZ130478     | uncultured phage cr151_1          | dsDNA |
| <i>Asinivirinae</i> | <i>Kolpuevirus</i>  | <i>Kolpuevirus hominis</i>             | MT774391     | uncultured phage cr126_1          | dsDNA |
| <i>Asinivirinae</i> | <i>Lahndsivirus</i> | <i>Lahndsivirus rarus</i>              | MT774387     | uncultured phage cr111_1          | dsDNA |
| <i>Asinivirinae</i> | <i>Lebriduvirus</i> | <i>Lebriduvirus gastrointestinalis</i> | MZ130485     | uncultured phage cr18_1           | dsDNA |
| <i>Asinivirinae</i> | <i>Mahlunavirus</i> | <i>Mahlunavirus rarus</i>              | MT774392     | uncultured phage cr128_1          | dsDNA |
| <i>Asinivirinae</i> | <i>Mahstovirus</i>  | <i>Mahstovirus faecalis</i>            | MT774378     | uncultured phage cr106_1          | dsDNA |
| <i>Asinivirinae</i> | <i>Pamirivirus</i>  | <i>Pamirivirus faecium</i>             | MT774389     | uncultured phage cr116_1          | dsDNA |
| <i>Asinivirinae</i> | <i>Paundivirus</i>  | <i>Paundivirus hollandii</i>           | KJ003983     | IAS virus                         | dsDNA |
| <i>Asinivirinae</i> | <i>Pipoluvirus</i>  | <i>Pipoluvirus rarus</i>               | MT774385     | uncultured phage cr108_1          | dsDNA |
| <i>Asinivirinae</i> | <i>Wulfhauvirus</i> | <i>Wulfhauvirus bangladeshii</i>       | MT074136     | <i>Bacteroides</i> phage DAC15    | dsDNA |





## Supplementary references

1. Puig, A., Queralt, N., Jofre, J., and Araujo, R. (1999). Diversity of *Bacteroides fragilis* strains in their capacity to recover phages from human and animal wastes and from fecally polluted wastewater. *Appl Environ Microbiol* *65*, 1772–1776.
2. Tartera, C., and Jofre, J. (1987). Bacteriophages active against *Bacteroides fragilis* in sewage-polluted waters. *Appl Environ Microbiol* *53*, 1632–1637.
3. Ebdon, J., Muniesa, M., and Taylor, H. (2007). The application of a recently isolated strain of *Bacteroides* (GB-124) to identify human sources of faecal pollution in a temperate river catchment. *Water Res* *41*, 3683–3690.
4. Ogilvie, L.A., Caplin, J., Dedi, C., Diston, D., Cheek, E., Bowler, L., Taylor, H., Ebdon, J., and Jones, B. v (2012). Comparative (meta)genomic analysis and ecological profiling of human gut-specific bacteriophage  $\phi$ B124-14. *PLoS One* *7*, e35053. 10.1371/journal.pone.0035053.
5. Sperry, J.F., Appleman, M.D., and Wilkins, T.D. (1977). Requirement of heme for growth of *Bacteroides fragilis*. *Appl Environ Microbiol* *34*, 386. 10.1128/AEM.34.4.386-390.1977.
6. Rashtchian, A., Dubes, G.R., and Booth, S.J. (1982). Tetracycline-inducible transfer of tetracycline resistance in *Bacteroides fragilis* in the absence of detectable plasmid DNA. *J Bacteriol* *150*, 141. 10.1128/JB.150.1.141-147.1982.
7. Wright, D.P., Knight, C.G., Parkar, S.G., Christie, D.L., and Robertson, A.M. (2000). Cloning of a Mucin-Desulfating Sulfatase Gene from *Prevotella* Strain RS2 and Its Expression Using a *Bacteroides* Recombinant System. *J Bacteriol* *182*, 3002. 10.1128/JB.182.11.3002-3007.2000.
8. Bergan, T., and Hovig, B. (1968). A new species, *Sphaerophorus intermedius*, isolated from empyema. *Acta Pathol Microbiol Scand* *74*, 421–430. 10.1111/J.1699-0463.1968.TB03496.X.
9. Privitera, F., Dublanquet, A., and Sebald, M. (1979). Transfer of multiple antibiotic resistance between subspecies of *Bacteroides fragilis*. *J Infect Dis* *139*, 97–101. 10.1093/INFDIS/139.1.97.
10. Gómez-Doñate, M., Payán, A., Cortés, I., Blanch, A.R., Lucena, F., Jofre, J., and Muniesa, M. (2011). Isolation of bacteriophage host strains of *Bacteroides* species suitable for tracking sources of animal faecal pollution in water. *Environ Microbiol* *13*. 10.1111/j.1462-2920.2011.02474.x.
11. Coyne, M.J., Tzianabos, A.O., Mallory, B.C., Carey, V.J., Kasper, D.L., and Comstock, L.E. (2001). Polysaccharide Biosynthesis Locus Required

for Virulence of *Bacteroides fragilis*. *Infect Immun* 69, 4342.  
10.1128/IAI.69.7.4342-4350.2001.

12. Payan, A., Ebdon, J., Taylor, H., Gantzer, C., Ottoson, J., Papageorgiou, G.T., Blanch, A.R., Lucena, F., Jofre, J., and Muniesa, M. (2005). Method for isolation of *Bacteroides* bacteriophage host strains suitable for tracking sources of fecal pollution in water. *Appl Environ Microbiol* 71, 5659–5662.  
10.1128/AEM.71.9.5659-5662.2005.
13. Sutter, V.L., Emmerman, J., Randall, E., Zabransky, R.J., and Birk, R.J. (1985). Establishment of MICs of moxalactam for control and reference anaerobic organisms in agar dilution and microdilution techniques. *Antimicrob Agents Chemother* 27, 424. 10.1128/AAC.27.3.424.
14. Eggerth, A.H., and Gagnon, B.H. (1933). The *Bacteroides* of Human Feces. *J Bacteriol* 25, 389. 10.1128/JB.25.4.389-413.1933.
